# Supplementary material for: Perspectives of older adults, caregivers, and healthcare providers on frailty screening: a qualitative study
Source: PubMed Central journal article supplement (PMC7027098; doi:10.1186/s12877-020-1459-6), 2020-02-17

Older Adult and Caregiver Coding Tree

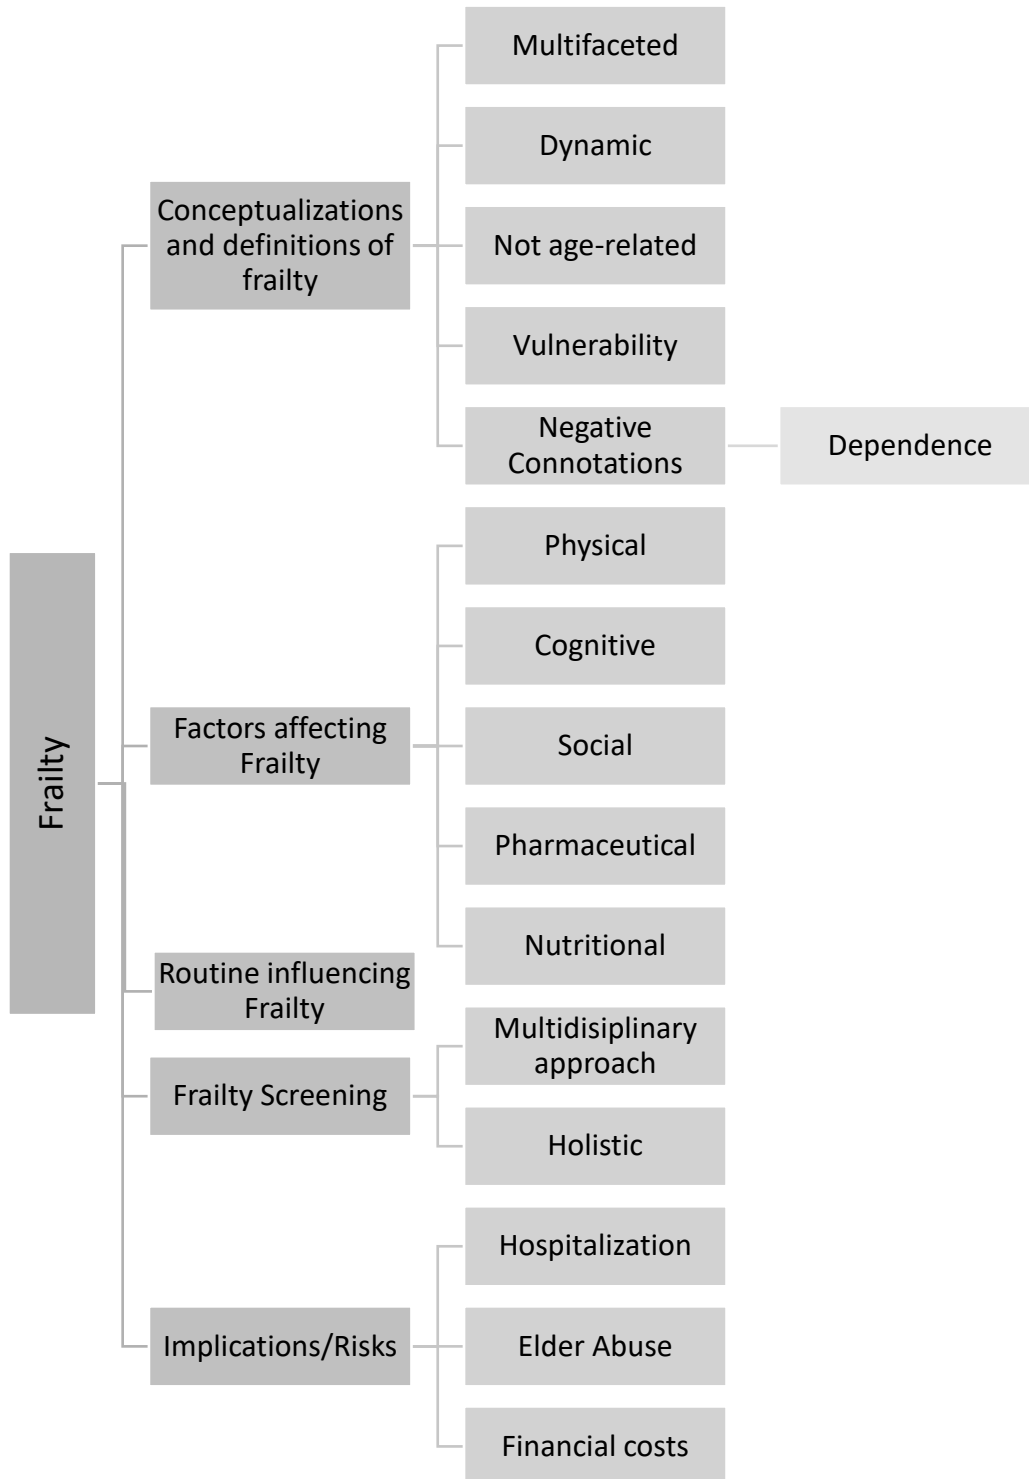

Healthcare Provider Coding Tree: Frailty

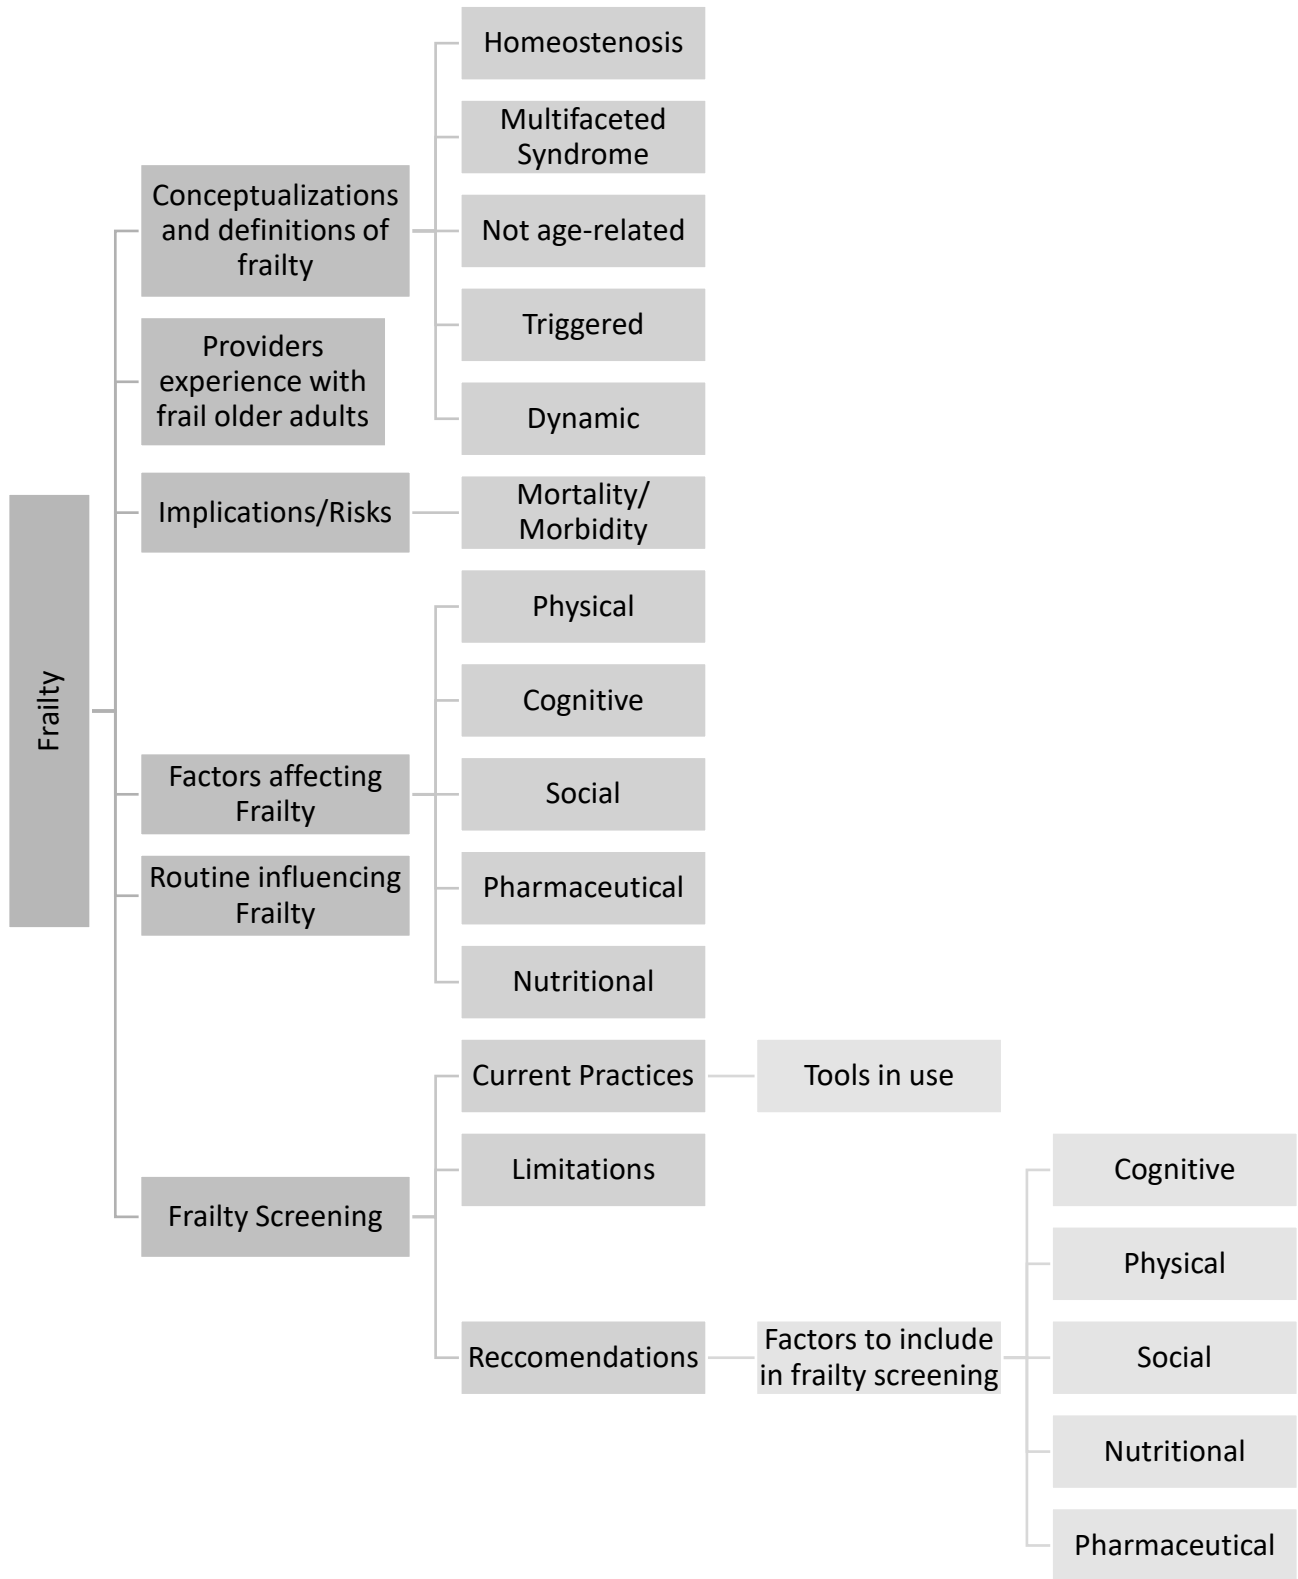

Supplement: 12877_2020_1459_MOESM2_ESM.pdf [file 12877_2020_1459_MOESM2_ESM.pdf]
